# Supplementary material for: Cause-specific mortality of low and selective intermediate-risk prostate cancer patients with active surveillance or watchful waiting
Source: PubMed Central journal article supplement — Transl Androl Urol. 2021 Jan;10(1):154–63. doi: 10.21037/tau-20-994 (PMC7844492; doi:10.21037/tau-20-994), 2021-01
Supplement: tau-10-01-154-supplementary.pdf [file tau-10-01-154-supplementary.pdf]

**Table S1** Patients characteristics of training and validation cohorts

| Characteristics            | All patients   | Training      | Validation    | P value |
|----------------------------|----------------|---------------|---------------|---------|
| Patients, no., %           | 30,538 (100.0) | 15,270 (50.0) | 15,268 (50.0) |         |
| Age, average years (range) | 65 (34–105)    | 65 (35–105)   | 65 (34–99)    | 0.42    |
| PSA, average ng/mL (range) | 5.7 (0.1–9.9)  | 5.7 (0.1–9.9) | 5.7 (0.1–9.9) | 0.64    |
| Race, no. (%)              |                |               |               | 0.59    |
| Other                      | 1,611 (5.3)    | 787 (5.2)     | 824 (5.4)     |         |
| White                      | 23,686 (77.6)  | 11,846 (77.6) | 11,840 (77.5) |         |
| Black                      | 5,241 (17.1)   | 2,637 (17.2)  | 2,604 (17.1)  |         |
| Marital status, no., (%)   |                |               |               | 0.37    |
| Married                    | 22,037 (72.2)  | 10,984 (71.9) | 11,053 (72.4) |         |
| Unmarried                  | 8,501 (27.8)   | 4,286 (27.1)  | 4,215 (27.6)  |         |
| cT stage, no., (%)         |                |               |               | 0.17    |
| T1c                        | 28,663 (93.9)  | 14,361 (94.0) | 14,302 (93.7) |         |
| T2a                        | 1,875 (6.1)    | 909 (6.0)     | 966 (6.3)     |         |
| ISUP grade, no., (%)       |                |               |               | 0.88    |
| 1                          | 25,376 (83.1)  | 12,683 (83.1) | 12,693 (83.1) |         |
| 2                          | 5,163 (16.9)   | 2,587 (16.9)  | 2,576 (16.9)  |         |
| Cause of death, no., (%)   |                |               |               | 0.91    |
| prostate cancer            | 358 (11.6)     | 176 (11.5)    | 182 (11.7)    |         |
| other causes               | 2,727 (88.4)   | 1352 (88.5)   | 137 (88.3)    |         |
| Follow-up after diagnosis  |                |               |               |         |
| Average months (range)     | 64 (1–155)     | 64 (1–155)    | 64 (1–155)    | 0.82    |

PSA, prostate specific antigen; cT stage, clinical T stage; ISUP, International Society of Urological Pathology. P value: Student's t test and Chi-square test was used to test whether there was any difference in clinical characteristics between the training and validation cohorts.
